# Supplementary material
Source: PubMed Central journal article supplement (PMC6086366)

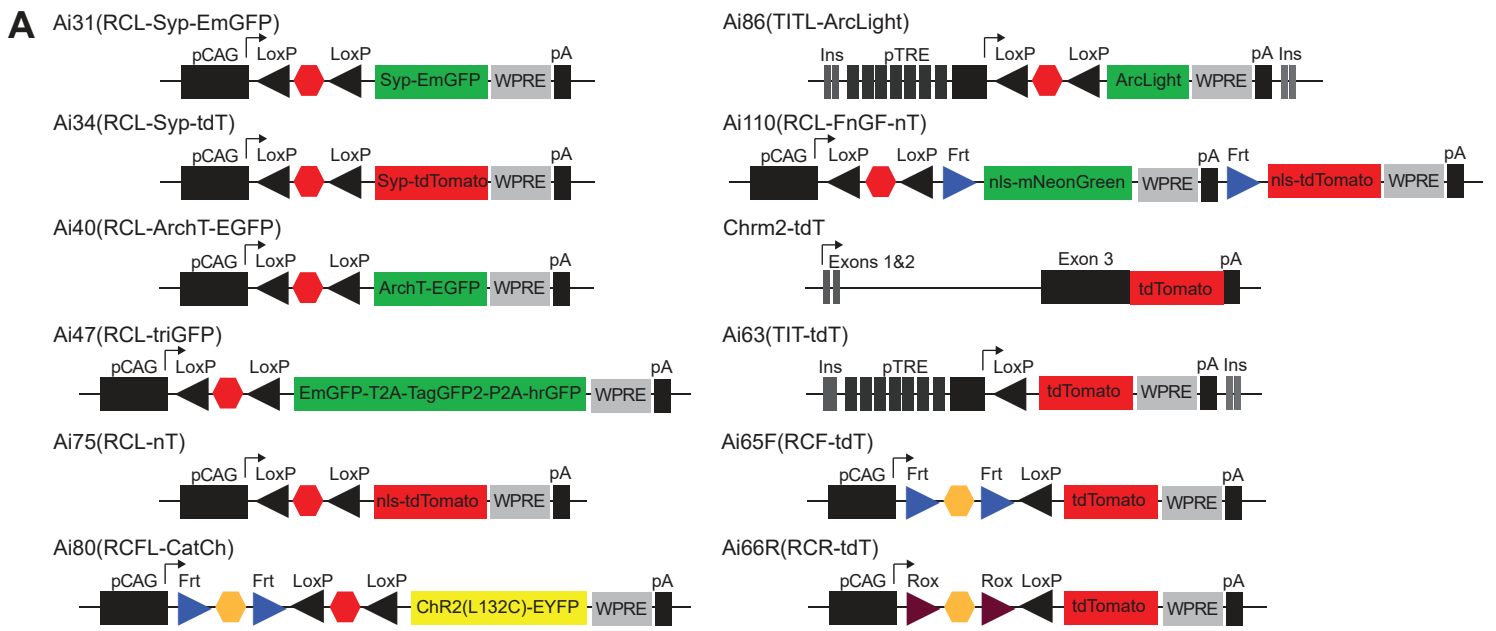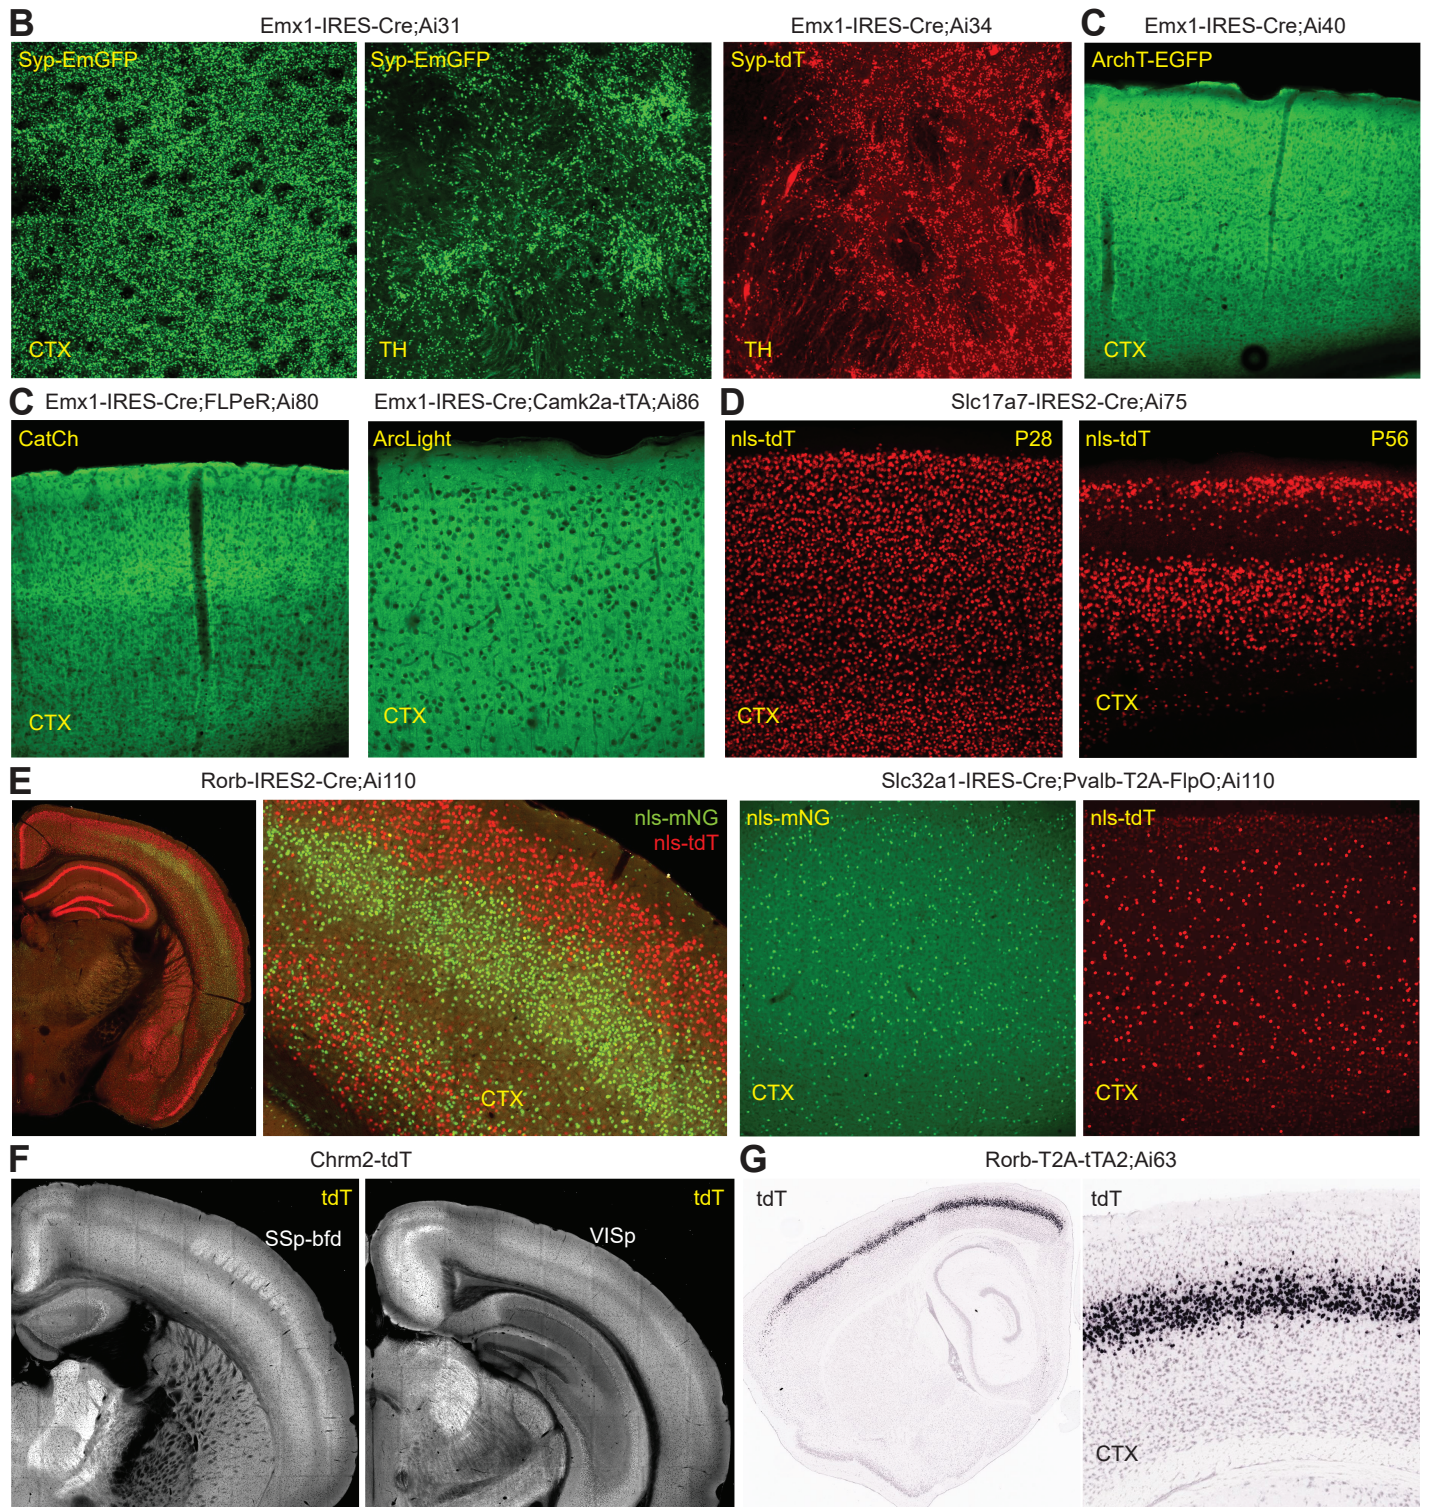

Supplement: NIHMS979655-supplement-1.pdf [file NIHMS979655-supplement-1.pdf]

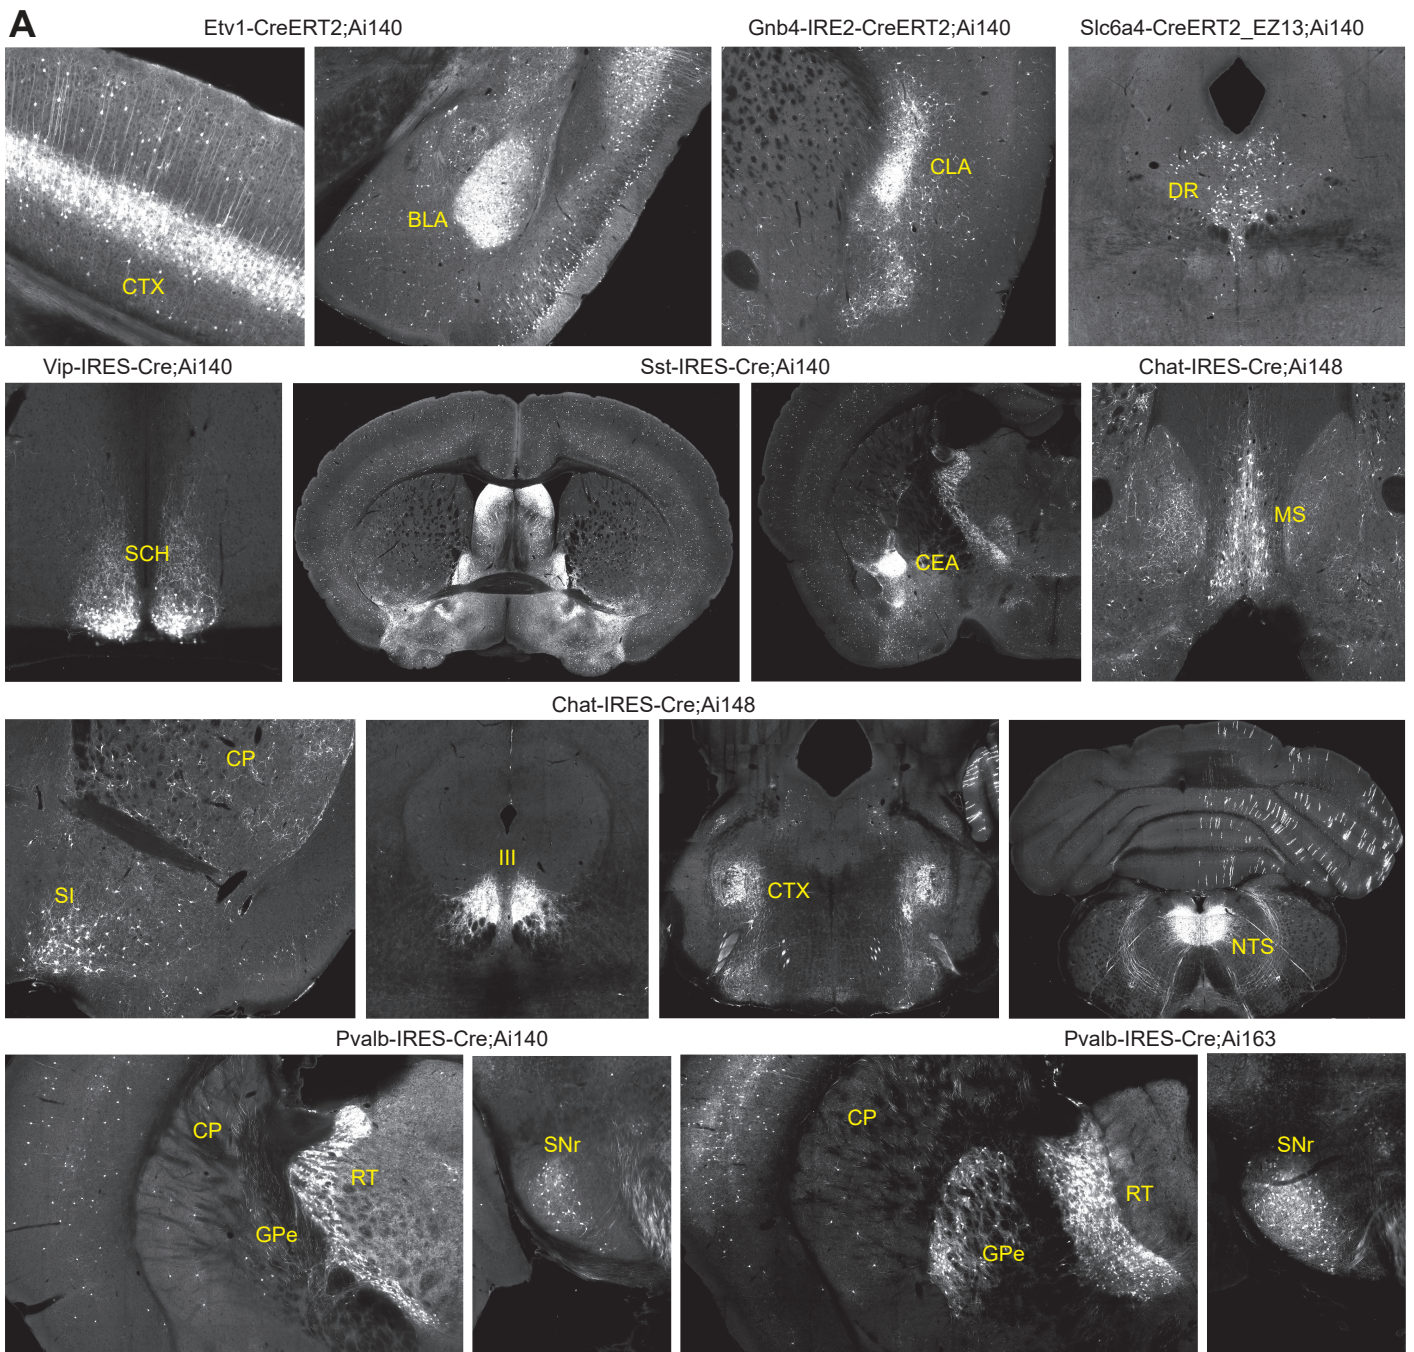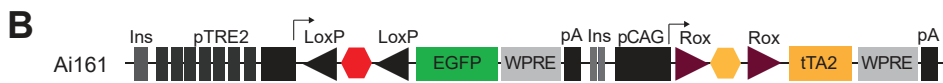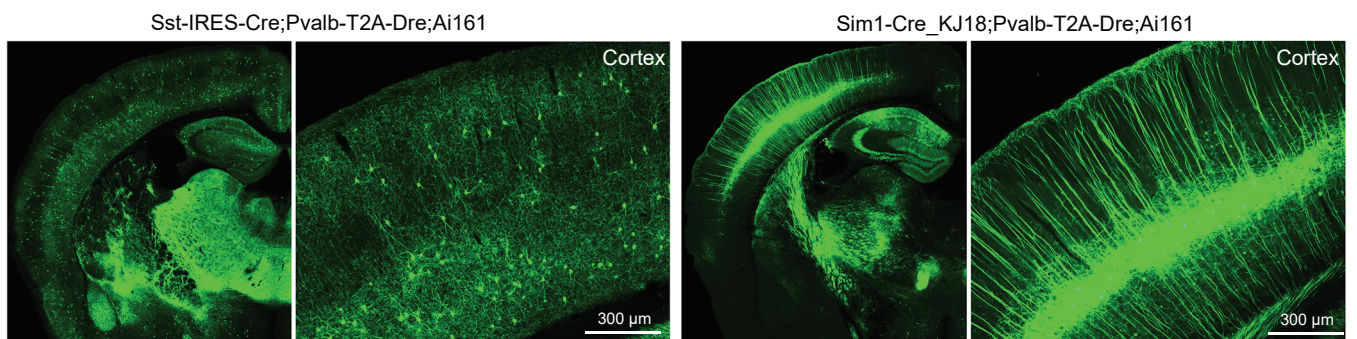

Supplement: NIHMS979655-supplement-2.pdf [file NIHMS979655-supplement-2.pdf]

**A**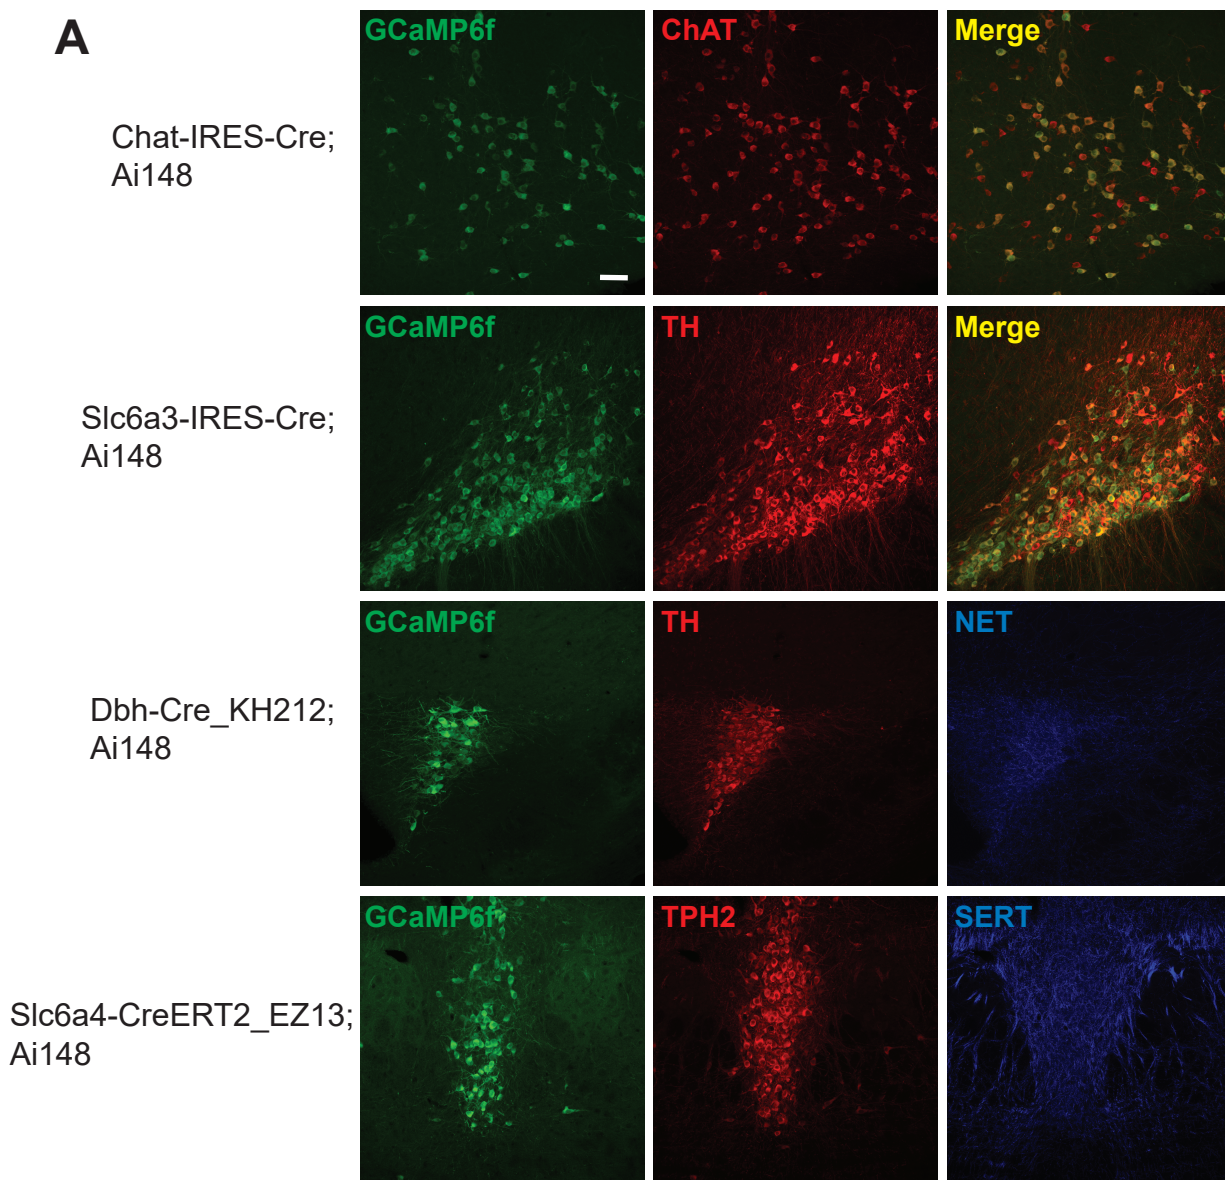**B**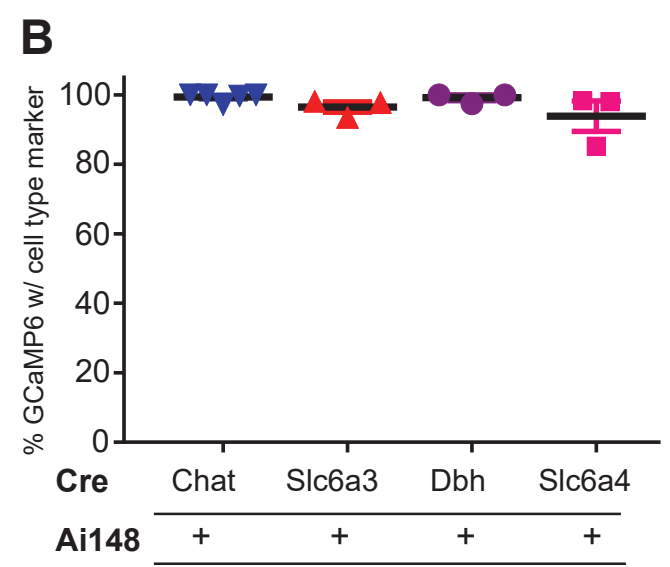**C**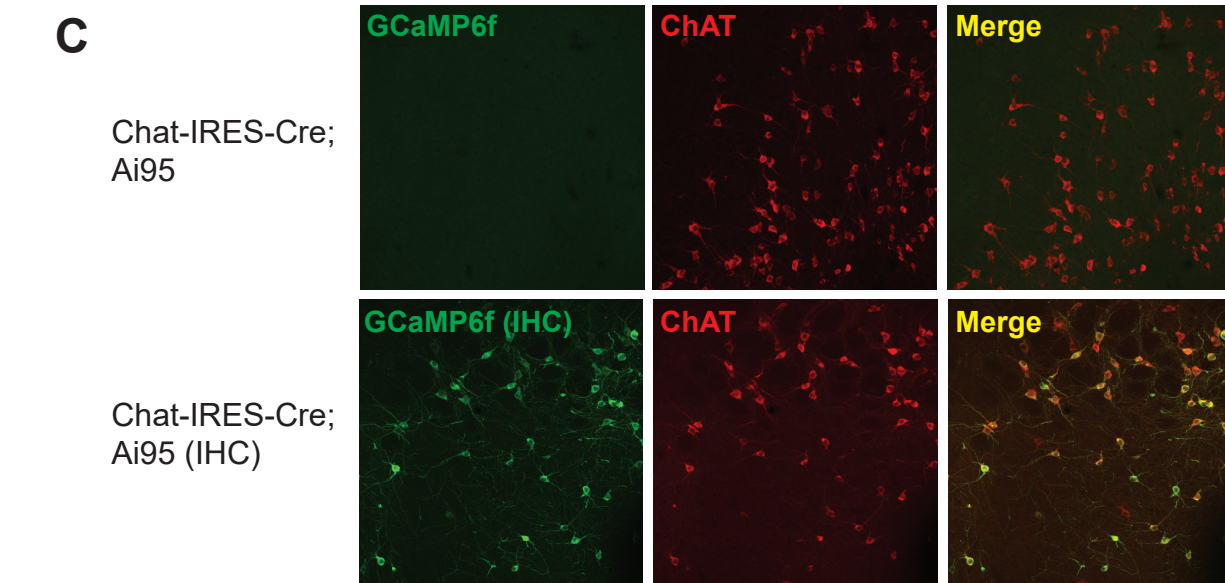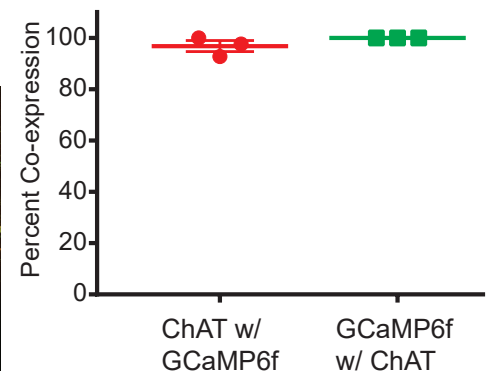**D**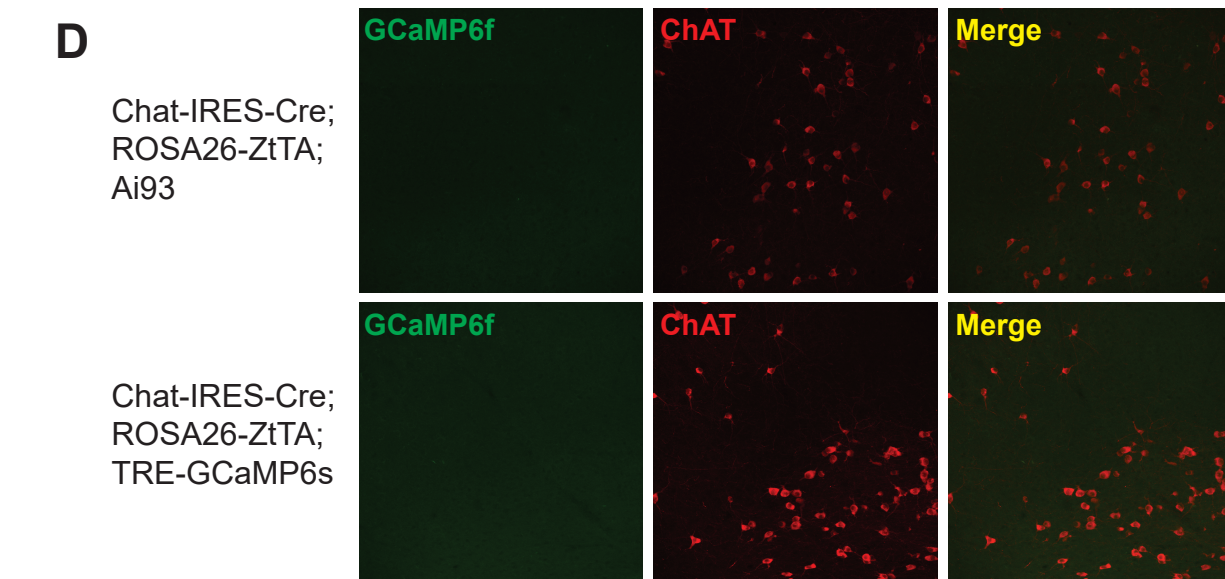

\*No expression with antibody enhancement

\*No expression with antibody enhancement

Supplement: NIHMS979655-supplement-3.pdf [file NIHMS979655-supplement-3.pdf]

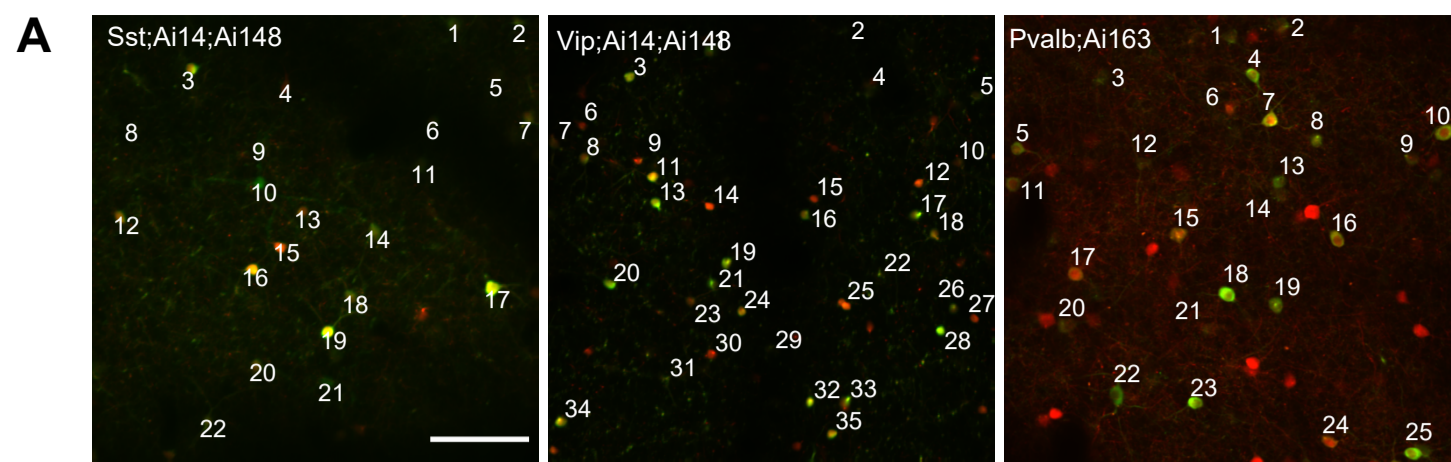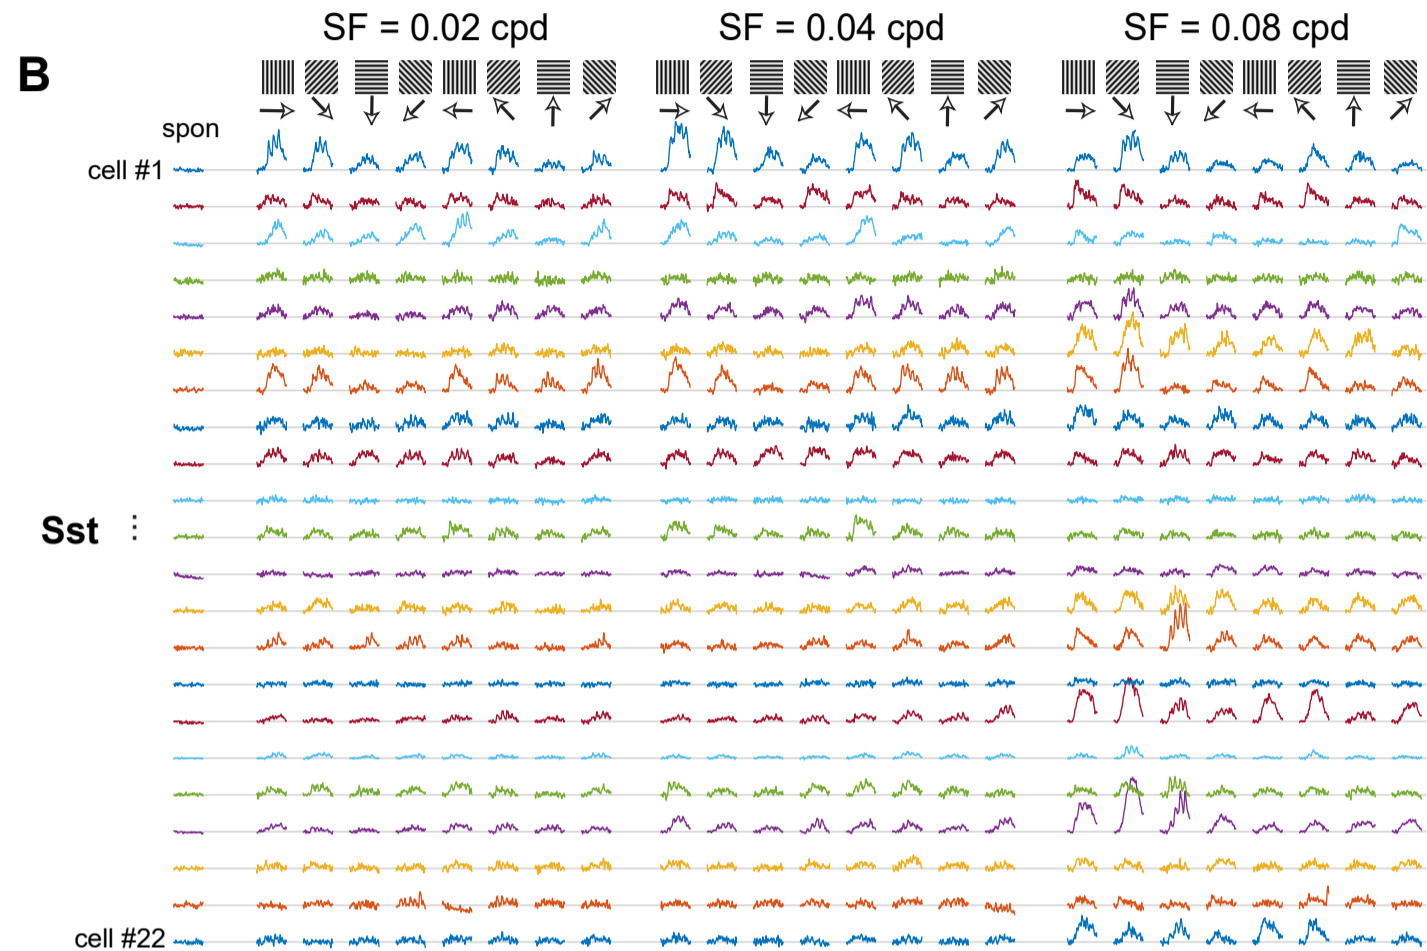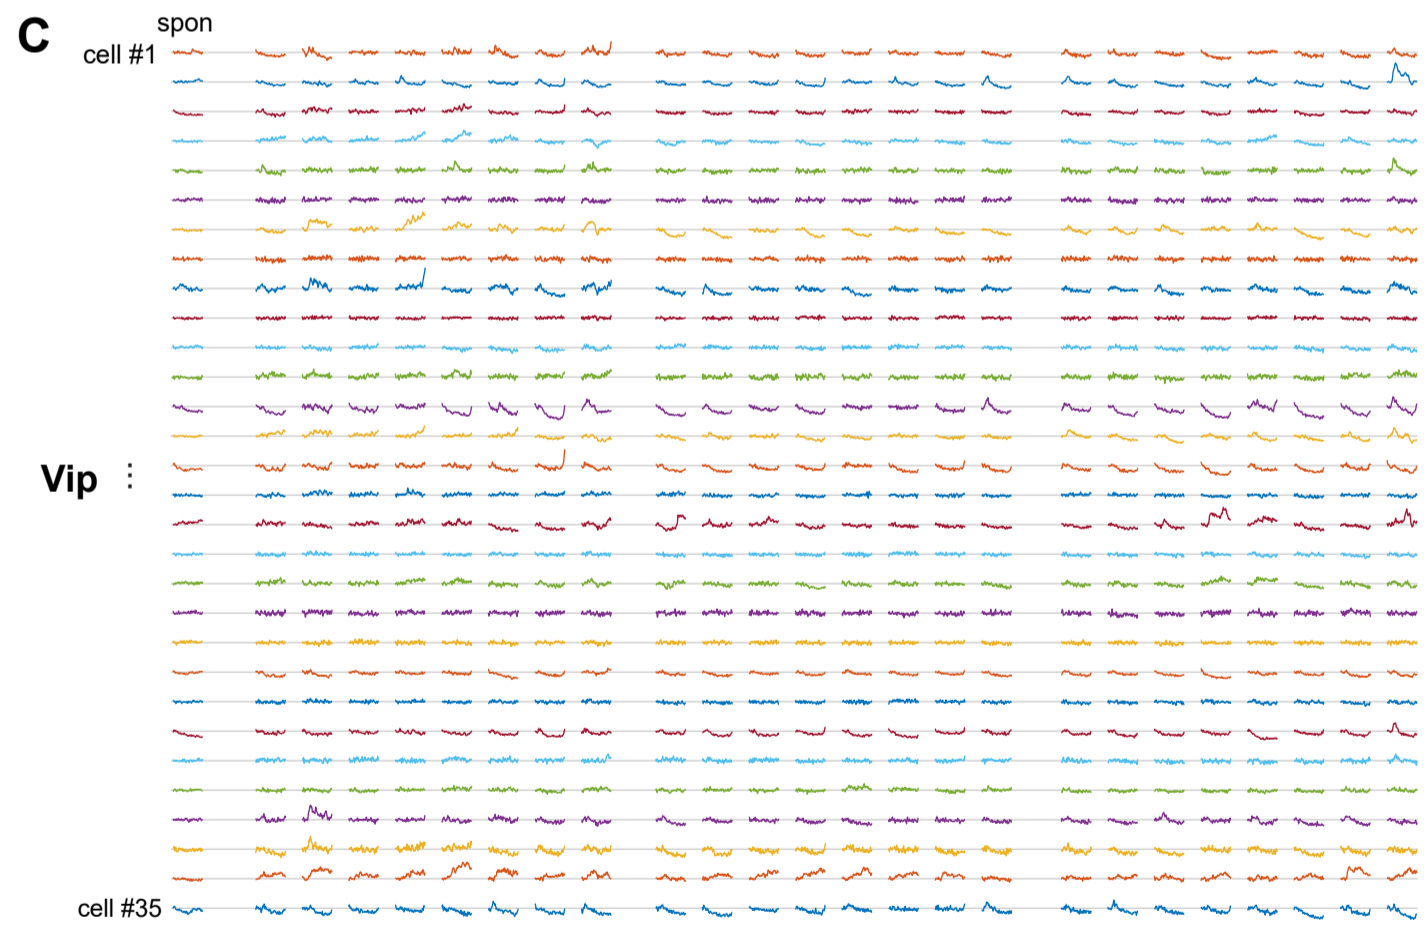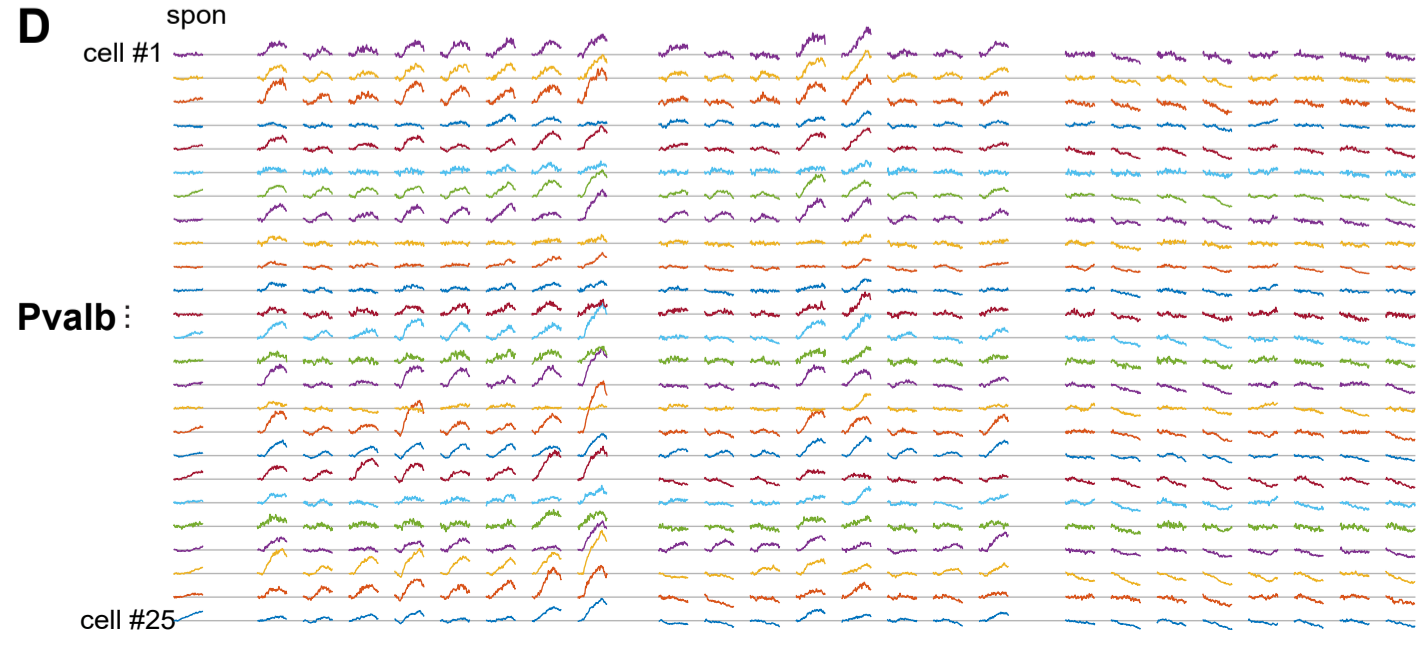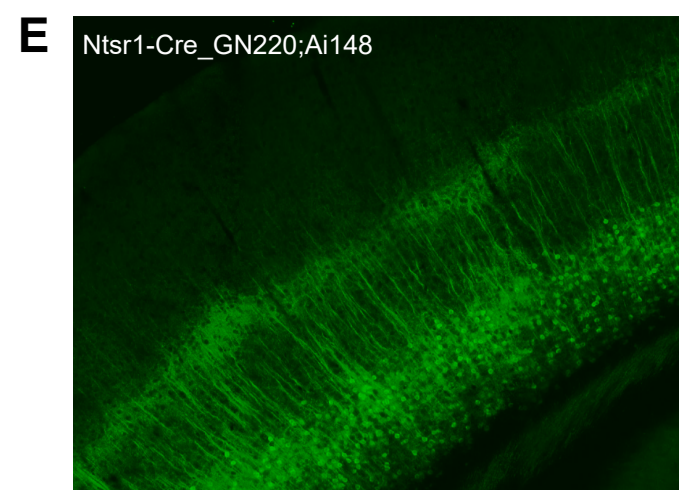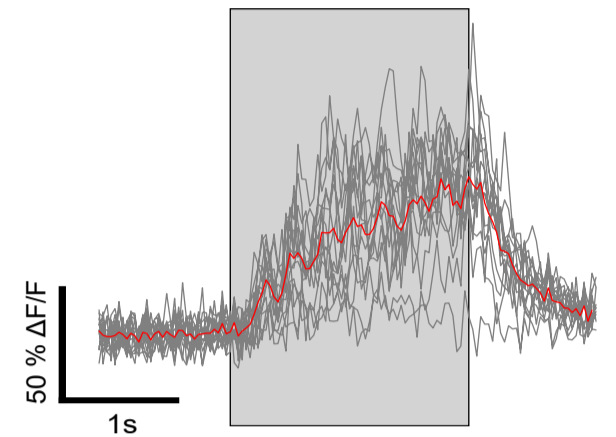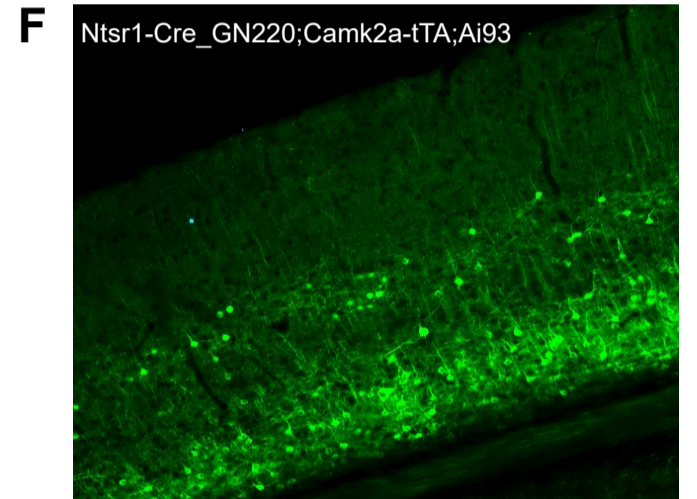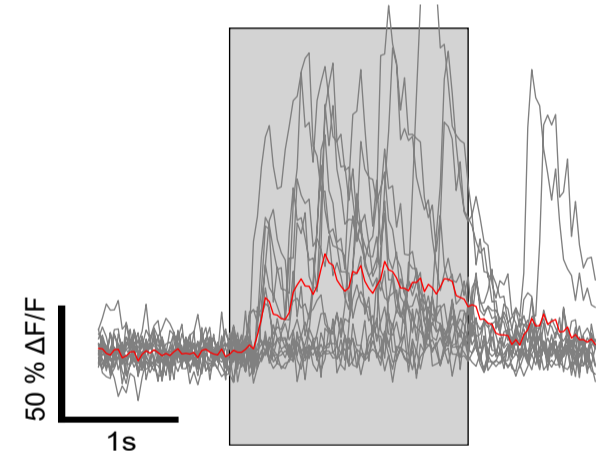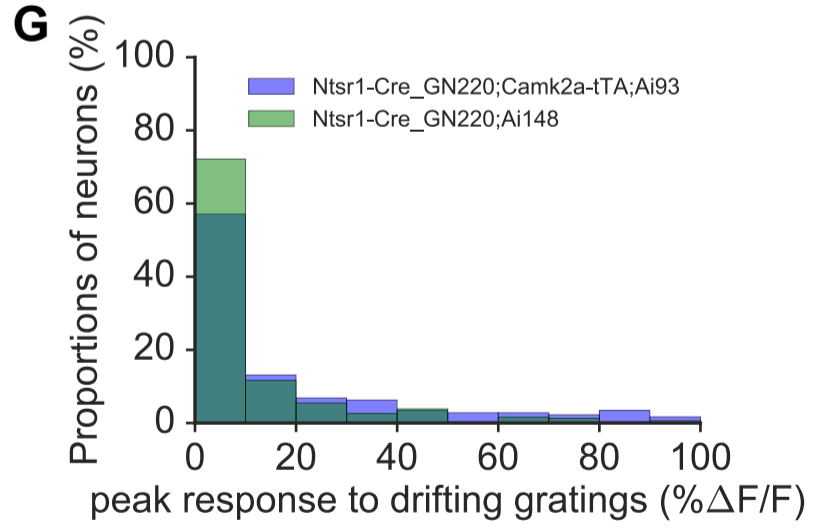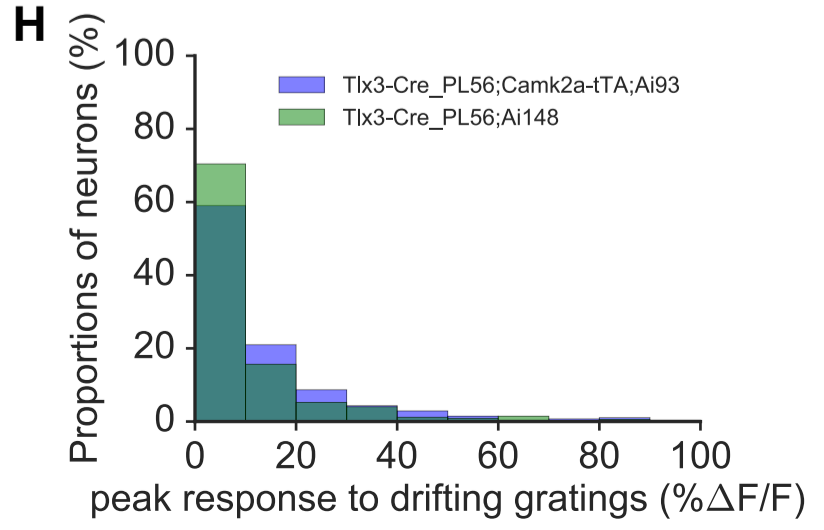

Supplement: NIHMS979655-supplement-5.pdf [file NIHMS979655-supplement-5.pdf]

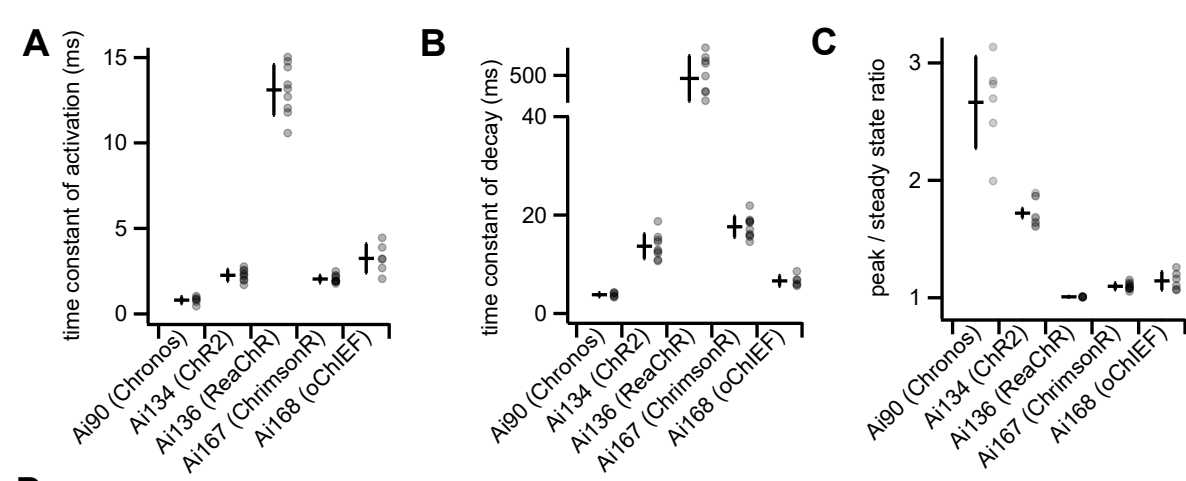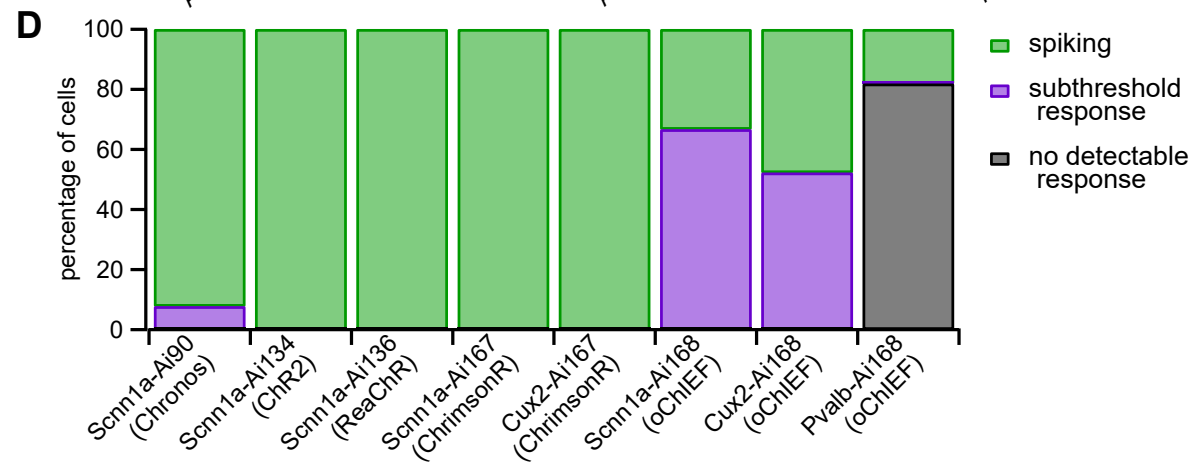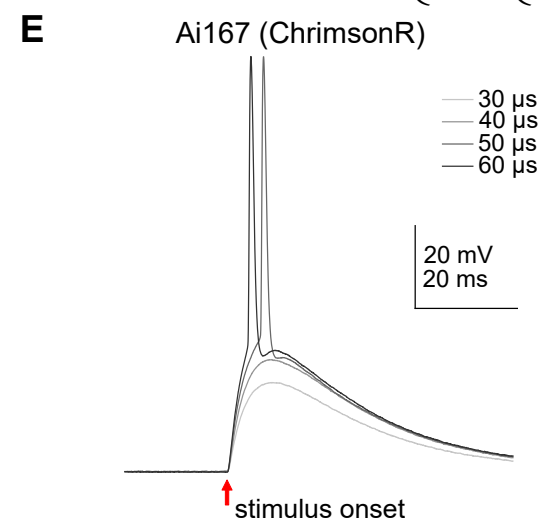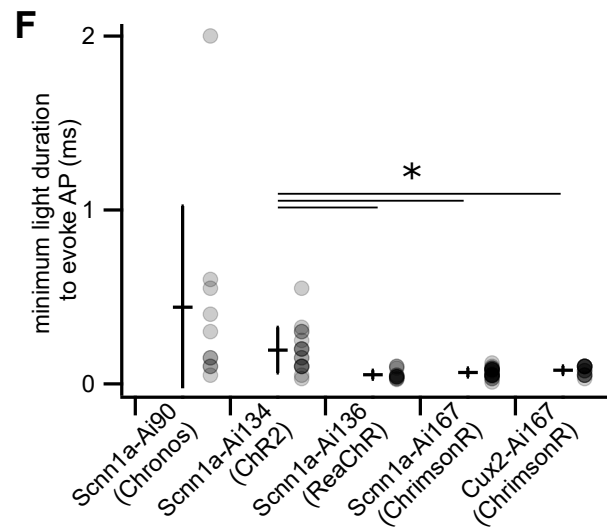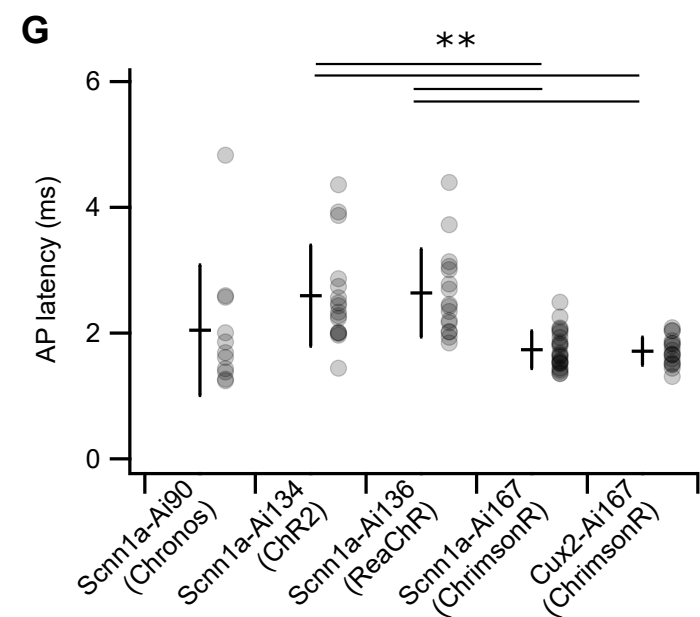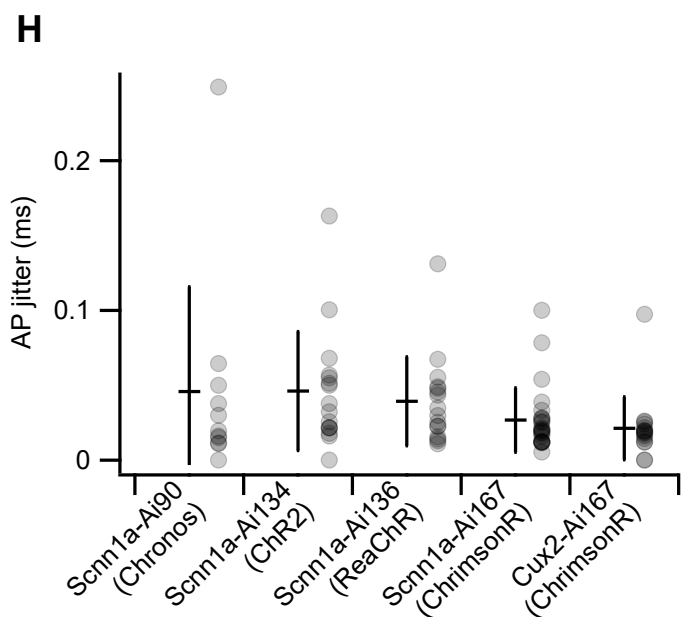

Supplement: NIHMS979655-supplement-6.pdf [file NIHMS979655-supplement-6.pdf]

**A**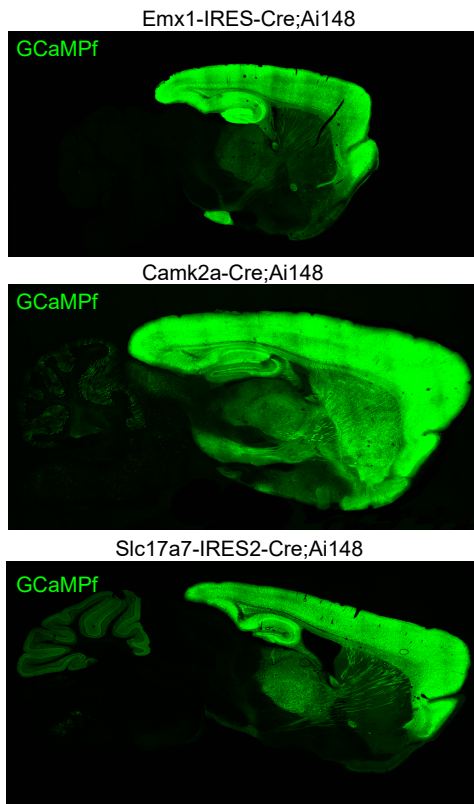**B**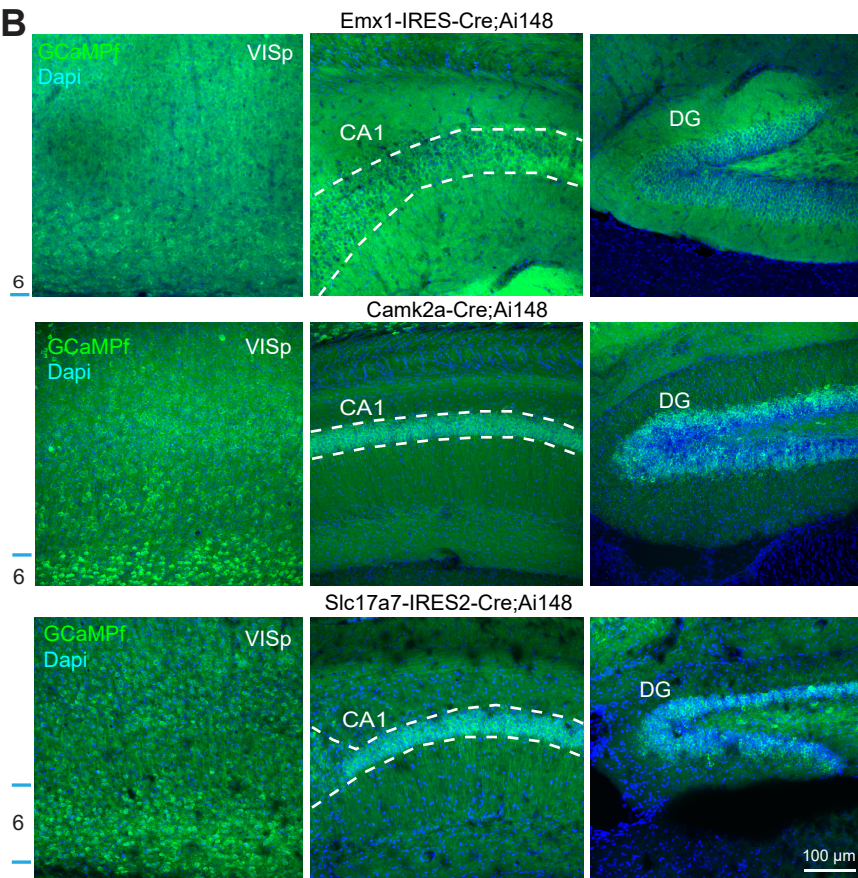**C**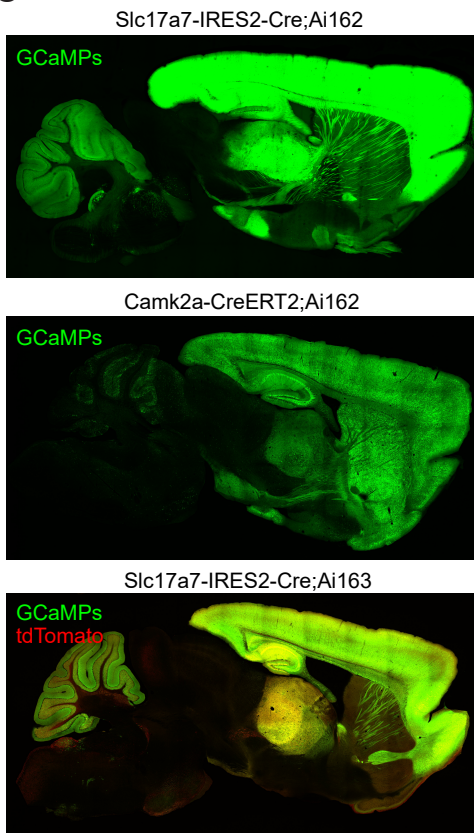**D**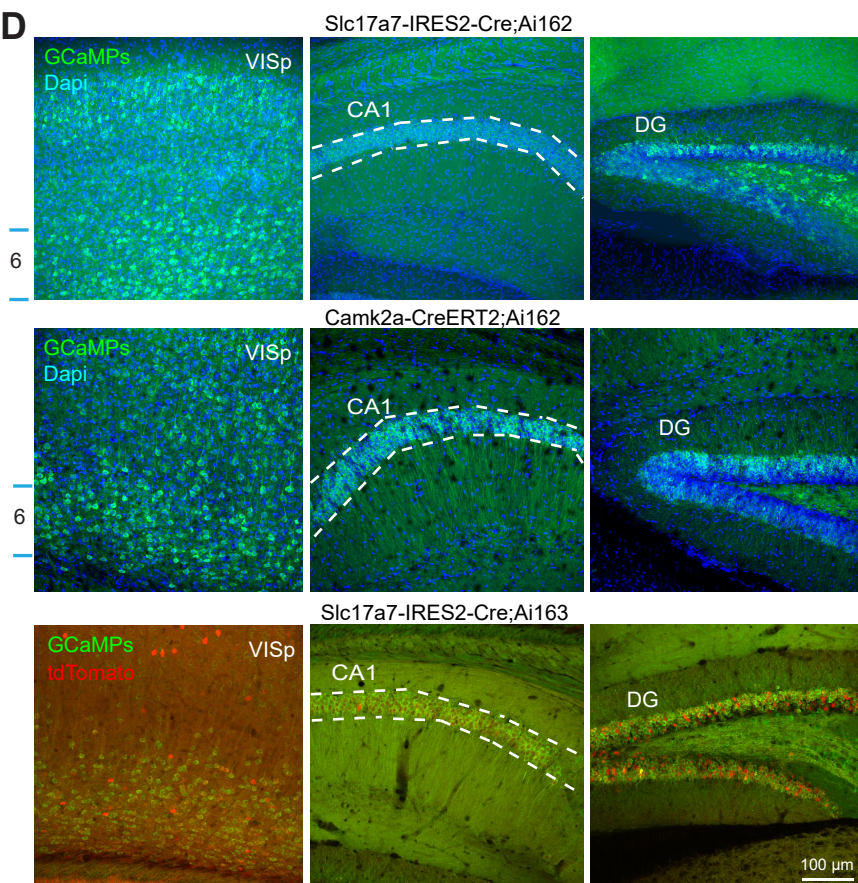

Supplement: NIHMS979655-supplement-7.pdf [file NIHMS979655-supplement-7.pdf]
